# Supplementary material for: Differentiable simulation to develop molecular dynamics force fields for disordered proteins
Source: Royal Society of Chemistry journal article supplement (doi:10.1039/d3sc05230c), 2024-01-01
Supplement: d3sc05230c1.pdf [file d3sc05230c1.pdf]

# Differentiable simulation to develop molecular dynamics force fields for disordered proteins

Joe G Greener

## Supplementary Data

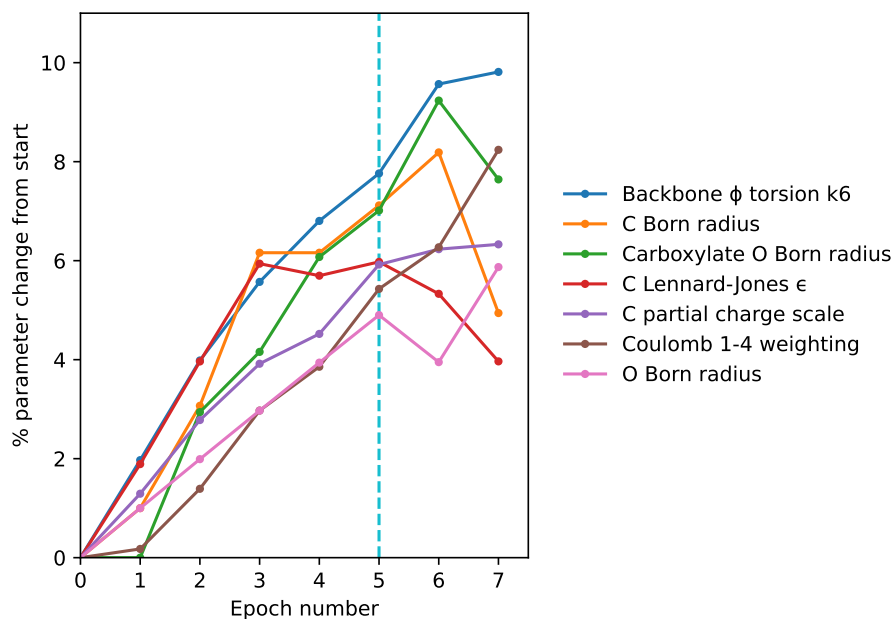

**Figure S1** Parameter changes during training. The change in absolute value of 7 parameters that change by at least 4.5% in absolute value from the starting values in a99SB-*disp*+GBNeck2 are shown. Parameters after epoch 5 were used in GB99dms, as indicated by a cyan line.

**Table S1** Parameters in GB99dms. The other parameters not changed during training are the same as in a99SB-*disp* or GBNeck2. The atom type HO LJ parameters are zero in a99SB-*disp* so are not modified. This table is available in CSV format in the data repository.

| Parameter                                    | Value in GB99dms | Value in a99SB- <i>disp</i> or GBNeck2 | Change over training | % change over training |
|----------------------------------------------|------------------|----------------------------------------|----------------------|------------------------|
| atom CA charge scale                         | 0.996            | 1.0                                    | -0.00395             | -0.39%                 |
| atom CA LJ $\sigma$ / nm                     | 0.342            | 0.34                                   | 0.00183              | 0.54%                  |
| atom CA LJ $\epsilon$ / kJ mol <sup>-1</sup> | 0.364            | 0.36                                   | 0.00452              | 1.26%                  |
| atom CT charge scale                         | 1.01             | 1.0                                    | 0.0104               | 1.04%                  |
| atom CT LJ $\sigma$ / nm                     | 0.337            | 0.34                                   | -0.00304             | -0.89%                 |
| atom CT LJ $\epsilon$ / kJ mol <sup>-1</sup> | 0.447            | 0.458                                  | -0.0111              | -2.43%                 |
| atom C charge scale                          | 1.06             | 1.0                                    | 0.0592               | 5.92%                  |
| atom C LJ $\sigma$ / nm                      | 0.352            | 0.34                                   | 0.0117               | 3.43%                  |
| atom C LJ $\epsilon$ / kJ mol <sup>-1</sup>  | 0.381            | 0.36                                   | 0.0215               | 5.98%                  |
| atom C8 charge scale                         | 0.999            | 1.0                                    | -0.000894            | -0.09%                 |
| atom C8 LJ $\sigma$ / nm                     | 0.339            | 0.34                                   | -0.000537            | -0.16%                 |
| atom C8 LJ $\epsilon$ / kJ mol <sup>-1</sup> | 0.457            | 0.458                                  | -0.00115             | -0.25%                 |
| atom C9 charge scale                         | 1.0              | 1.0                                    | -7.96e-05            | -0.01%                 |
| atom C9 LJ $\sigma$ / nm                     | 0.339            | 0.34                                   | -0.000495            | -0.15%                 |
| atom C9 LJ $\epsilon$ / kJ mol <sup>-1</sup> | 0.456            | 0.458                                  | -0.00204             | -0.45%                 |
| atom N charge scale                          | 1.0              | 1.0                                    | 0.00188              | 0.19%                  |
| atom N LJ $\sigma$ / nm                      | 0.339            | 0.325                                  | 0.0135               | 4.16%                  |
| atom N LJ $\epsilon$ / kJ mol <sup>-1</sup>  | 0.737            | 0.711                                  | 0.026                | 3.66%                  |
| atom N3 charge scale                         | 0.999            | 1.0                                    | -0.000968            | -0.10%                 |
| atom N3 LJ $\sigma$ / nm                     | 0.325            | 0.325                                  | 0.000179             | 0.05%                  |
| atom N3 LJ $\epsilon$ / kJ mol <sup>-1</sup> | 0.711            | 0.711                                  | 0.000102             | 0.01%                  |
| atom O charge scale                          | 1.01             | 1.0                                    | 0.00632              | 0.63%                  |
| atom O LJ $\sigma$ / nm                      | 0.296            | 0.296                                  | 0.000153             | 0.05%                  |
| atom O LJ $\epsilon$ / kJ mol <sup>-1</sup>  | 0.863            | 0.879                                  | -0.0159              | -1.81%                 |
| atom O2 charge scale                         | 1.01             | 1.0                                    | 0.00893              | 0.89%                  |
| atom O2 LJ $\sigma$ / nm                     | 0.298            | 0.296                                  | 0.00192              | 0.65%                  |
| atom O2 LJ $\epsilon$ / kJ mol <sup>-1</sup> | 0.879            | 0.879                                  | 0.000523             | 0.06%                  |
| atom OH charge scale                         | 1.0              | 1.0                                    | 0.00111              | 0.11%                  |
| atom OH LJ $\sigma$ / nm                     | 0.305            | 0.307                                  | -0.00125             | -0.41%                 |
| atom OH LJ $\epsilon$ / kJ mol <sup>-1</sup> | 0.879            | 0.88                                   | -0.00152             | -0.17%                 |
| atom H charge scale                          | 1.0              | 1.0                                    | 0.000143             | 0.01%                  |
| atom H LJ $\sigma$ / nm                      | 0.105            | 0.107                                  | -0.00178             | -1.66%                 |
| atom H LJ $\epsilon$ / kJ mol <sup>-1</sup>  | 0.065            | 0.0657                                 | -0.000736            | -1.12%                 |
| atom H1 charge scale                         | 1.0              | 1.0                                    | -9.15e-05            | -0.01%                 |
| atom H1 LJ $\sigma$ / nm                     | 0.246            | 0.247                                  | -0.00136             | -0.55%                 |
| atom H1 LJ $\epsilon$ / kJ mol <sup>-1</sup> | 0.0656           | 0.0657                                 | -0.000109            | -0.17%                 |
| atom HA charge scale                         | 1.0              | 1.0                                    | -9.91e-06            | -0.00%                 |
| atom HA LJ $\sigma$ / nm                     | 0.261            | 0.26                                   | 0.000723             | 0.28%                  |
| atom HA LJ $\epsilon$ / kJ mol <sup>-1</sup> | 0.063            | 0.0628                                 | 0.00022              | 0.35%                  |
| atom HC charge scale                         | 1.0              | 1.0                                    | -0.000251            | -0.03%                 |
| atom HC LJ $\sigma$ / nm                     | 0.259            | 0.265                                  | -0.00634             | -2.39%                 |
| atom HC LJ $\epsilon$ / kJ mol <sup>-1</sup> | 0.0637           | 0.0657                                 | -0.00201             | -3.06%                 |
| atom HO charge scale                         | 1.0              | 1.0                                    | -9.49e-05            | -0.01%                 |
| atom HP charge scale                         | 1.0              | 1.0                                    | 2.04e-05             | 0.00%                  |
| atom HP LJ $\sigma$ / nm                     | 0.196            | 0.196                                  | 0.000429             | 0.22%                  |
| atom HP LJ $\epsilon$ / kJ mol <sup>-1</sup> | 0.0658           | 0.0657                                 | 8.14e-05             | 0.12%                  |

| Parameter                                     | Value in<br>GB99dms | Value in<br>a99SB- <i>disp</i><br>or GBNeck2 | Change over<br>training | % change<br>over training |
|-----------------------------------------------|---------------------|----------------------------------------------|-------------------------|---------------------------|
| Lennard-Jones 1-4 weighting                   | 0.51                | 0.5                                          | 0.00979                 | 1.96%                     |
| Coulomb 1-4 weighting                         | 0.879               | 0.833                                        | 0.0452                  | 5.43%                     |
| torsion -/C/N/- k1 / kJ mol <sup>-1</sup>     | -10.5               | -10.5                                        | 0.00207                 | 0.02%                     |
| torsion -/CA/CA/- k1 / kJ mol <sup>-1</sup>   | -15.2               | -15.2                                        | -7.93e-06               | -0.00%                    |
| torsion -/CT/C8/- k1 / kJ mol <sup>-1</sup>   | 0.648               | 0.649                                        | -0.00068                | -0.10%                    |
| torsion -/CT/C9/- k1 / kJ mol <sup>-1</sup>   | 0.649               | 0.649                                        | 0.000208                | 0.03%                     |
| torsion -/CT/CT/- k1 / kJ mol <sup>-1</sup>   | 0.655               | 0.651                                        | 0.00405                 | 0.62%                     |
| torsion -/CT/N3/- k1 / kJ mol <sup>-1</sup>   | 0.651               | 0.651                                        | 6.06e-05                | 0.01%                     |
| torsion C/N/CT/C k1 / kJ mol <sup>-1</sup>    | -0.14               | -0.142                                       | 0.00256                 | 1.80%                     |
| torsion C/N/CT/C k2 / kJ mol <sup>-1</sup>    | 1.4                 | 1.4                                          | 0.000432                | 0.03%                     |
| torsion C/N/CT/C k3 / kJ mol <sup>-1</sup>    | 2.27                | 2.28                                         | -0.00382                | -0.17%                    |
| torsion C/N/CT/C k4 / kJ mol <sup>-1</sup>    | 0.332               | 0.335                                        | -0.00223                | -0.67%                    |
| torsion C/N/CT/C k5 / kJ mol <sup>-1</sup>    | 1.67                | 1.67                                         | -0.00378                | -0.23%                    |
| torsion CT/CT/C/N k1 / kJ mol <sup>-1</sup>   | 0.837               | 0.837                                        | -0.000137               | -0.02%                    |
| torsion CT/CT/C/N k2 / kJ mol <sup>-1</sup>   | 0.837               | 0.837                                        | 0.000467                | 0.06%                     |
| torsion CT/CT/C/N k3 / kJ mol <sup>-1</sup>   | 1.67                | 1.67                                         | -0.00251                | -0.15%                    |
| torsion CT/CT/N/C k1 / kJ mol <sup>-1</sup>   | 8.37                | 8.37                                         | -0.00109                | -0.01%                    |
| torsion CT/CT/N/C k2 / kJ mol <sup>-1</sup>   | 8.37                | 8.37                                         | 0.00268                 | 0.03%                     |
| torsion CT/CT/N/C k3 / kJ mol <sup>-1</sup>   | 1.67                | 1.67                                         | -0.0032                 | -0.19%                    |
| torsion H/N/C/O k1 / kJ mol <sup>-1</sup>     | 8.37                | 8.37                                         | 1.84e-05                | 0.00%                     |
| torsion H/N/C/O k2 / kJ mol <sup>-1</sup>     | -10.5               | -10.5                                        | -7.33e-05               | -0.00%                    |
| torsion H1/CT/C/O k1 / kJ mol <sup>-1</sup>   | 3.35                | 3.35                                         | 0.000823                | 0.02%                     |
| torsion H1/CT/C/O k2 / kJ mol <sup>-1</sup>   | -0.332              | -0.335                                       | 0.00321                 | 0.96%                     |
| torsion HC/CT/C4/CT k1 / kJ mol <sup>-1</sup> | 0.67                | 0.669                                        | 0.000134                | 0.02%                     |
| torsion N/CT/C/N k1 / kJ mol <sup>-1</sup>    | 2.72                | 2.72                                         | -0.00113                | -0.04%                    |
| torsion N/CT/C/N k2 / kJ mol <sup>-1</sup>    | -0.825              | -0.824                                       | -0.000732               | -0.09%                    |
| torsion N/CT/C/N k3 / kJ mol <sup>-1</sup>    | 6.05                | 6.05                                         | 0.000215                | 0.00%                     |
| torsion N/CT/C/N k4 / kJ mol <sup>-1</sup>    | 2.0                 | 2.0                                          | 0.000106                | 0.01%                     |
| torsion N/CT/C/N k5 / kJ mol <sup>-1</sup>    | -0.0776             | -0.0799                                      | 0.00232                 | 2.90%                     |
| torsion N/CT/C/N k6 / kJ mol <sup>-1</sup>    | -0.0154             | -0.0167                                      | 0.0013                  | 7.76%                     |
| torsion N/CT/C/N k7 / kJ mol <sup>-1</sup>    | -1.07               | -1.07                                        | 0.0                     | 0.00%                     |
| torsion N/CT/C/N k8 / kJ mol <sup>-1</sup>    | 0.314               | 0.314                                        | 0.0                     | 0.00%                     |
| torsion N/CT/C/N k9 / kJ mol <sup>-1</sup>    | 0.238               | 0.238                                        | 0.0                     | 0.00%                     |
| torsion N/CT/C/N k10 / kJ mol <sup>-1</sup>   | 0.105               | 0.105                                        | 0.0                     | 0.00%                     |
| torsion N/CT/C/N k11 / kJ mol <sup>-1</sup>   | -0.046              | -0.046                                       | 0.0                     | 0.00%                     |

| Parameter                                            | Value in GB99dms | Value in a99SB- <i>disp</i> or GBNeck2 | Change over training | % change over training |
|------------------------------------------------------|------------------|----------------------------------------|----------------------|------------------------|
| GB atom radius C / nm                                | 0.182            | 0.17                                   | 0.0121               | 7.12%                  |
| GB atom radius N / nm                                | 0.153            | 0.155                                  | -0.002               | -1.29%                 |
| GB atom radius O / nm                                | 0.143            | 0.15                                   | -0.00735             | -4.90%                 |
| GB atom radius O_CAR / nm                            | 0.13             | 0.14                                   | -0.00982             | -7.01%                 |
| GB atom radius H / nm                                | 0.124            | 0.12                                   | 0.00431              | 3.59%                  |
| GB atom radius H_N / nm                              | 0.125            | 0.13                                   | -0.00504             | -3.88%                 |
| GB atom parameter $\alpha$ C                         | 0.75             | 0.734                                  | 0.016                | 2.18%                  |
| GB atom parameter $\beta$ C                          | 0.487            | 0.506                                  | -0.0197              | -3.89%                 |
| GB atom parameter $\gamma$ C                         | 0.214            | 0.206                                  | 0.00859              | 4.17%                  |
| GB atom parameter $\alpha$ N                         | 0.507            | 0.503                                  | 0.00391              | 0.78%                  |
| GB atom parameter $\beta$ N                          | 0.318            | 0.317                                  | 0.0013               | 0.41%                  |
| GB atom parameter $\gamma$ N                         | 0.191            | 0.193                                  | -0.00227             | -1.18%                 |
| GB atom parameter $\alpha$ O                         | 0.837            | 0.868                                  | -0.0313              | -3.60%                 |
| GB atom parameter $\beta$ O                          | 0.899            | 0.877                                  | 0.0227               | 2.59%                  |
| GB atom parameter $\gamma$ O                         | 0.389            | 0.388                                  | 0.00134              | 0.35%                  |
| GB atom parameter $\alpha$ H                         | 0.788            | 0.788                                  | -0.000574            | -0.07%                 |
| GB atom parameter $\beta$ H                          | 0.799            | 0.799                                  | 0.000786             | 0.10%                  |
| GB atom parameter $\gamma$ H                         | 0.436            | 0.437                                  | -0.00122             | -0.28%                 |
| GB screening parameter C                             | 1.1              | 1.06                                   | 0.0456               | 4.30%                  |
| GB screening parameter N                             | 0.736            | 0.734                                  | 0.00278              | 0.38%                  |
| GB screening parameter O                             | 1.07             | 1.06                                   | 0.00517              | 0.49%                  |
| GB screening parameter H                             | 1.43             | 1.43                                   | 0.000751             | 0.05%                  |
| GB neck cutoff / nm                                  | 0.68             | 0.68                                   | 0.0                  | 0.00%                  |
| GB neck scale                                        | 0.853            | 0.827                                  | 0.0257               | 3.11%                  |
| GB offset / nm                                       | 0.0195           | 0.0195                                 | -1.38e-05            | -0.07%                 |
| GB probe radius / nm                                 | 0.134            | 0.14                                   | -0.00574             | -4.10%                 |
| GB SA factor / kJ mol <sup>-1</sup> nm <sup>-2</sup> | 28.4             | 28.4                                   | -0.000219            | -0.00%                 |

**Table S2** Consistency of gradients. In each case the gradients for the first epoch of training of the run yielding the final model are compared to the gradients for the first epoch of training of the run described. The fraction of corresponding parameter gradients with the same sign and the Pearson correlation coefficient of corresponding parameter gradients are calculated for each protein and the mean over proteins is shown. For the “Noise added to parameters” run, all starting parameter values were multiplied by a number uniformly-distributed in 0.95 to 1.05.

| Run details                          | Fraction same sign | Correlation |
|--------------------------------------|--------------------|-------------|
| Repeat 1                             | 0.775              | 0.878       |
| Repeat 2                             | 0.820              | 0.901       |
| 0.5 fs time step, 2.5 ns simulations | 0.694              | 0.777       |
| Noise added to parameters            | 0.767              | 0.859       |
